# Supplementary material
Source: Springer Nature journal article supplement (https://www.springermedizin.de/resource/supplementary/13024_2014_526_MOESM2_ESM.pdf/9644318)
Supplement: MOESM2 [file 9644318]

**Supplementary Table S2:** Antibodies that did not function well in immunohistochemistry or protein blotting to demonstrate snRNP aggregates or specific protein enrichment.

| <b>Antibody</b> | <b>Number</b> | <b>Company</b> |
|-----------------|---------------|----------------|
| DDX46           | Ab72083       | Abcam          |
| SNRPB           | Ab155026      | Abcam          |
| SNRPC           | Ab122901      | Abcam          |
| SNRPD1          | 10352-1-AP    | Proteintech    |
| U1-A            | Ab115527      | Abcam          |
